# Supplementary material
Source: publisher site journal article supplement (https://www.dovepress.com/article/585877)
Supplement: Supplementary file 1 [file 585877_Supplementary%20File_1.docx]

**Supplementary Table 1. Detailed Search Strategy**

| **Database** | **Search Strategy** | **Limits / Filters** |
| --- | --- | --- |
| **PubMed (MEDLINE)** | ("nurse-led triage"[Title/Abstract] OR "nursing triage"[Title/Abstract] OR "nurse supervised triage"[Title/Abstract] OR "standardized triage"[Title/Abstract] OR "structured triage"[Title/Abstract]) AND ("road traffic injury"[Title/Abstract] OR "traffic accident"[Title/Abstract] OR "road accident"[Title/Abstract] OR "injury"[Title/Abstract] OR "trauma"[Title/Abstract]) AND ("low-income countries"[MeSH Terms] OR "middle-income countries"[MeSH Terms] OR "developing countries"[MeSH Terms] OR "resource-limited settings"[Title/Abstract]) | English; Humans; Publication date: 1 January 2010–31 October 2025 |
| **Scopus** | TITLE-ABS-KEY(("nurse-led triage" OR "nursing triage" OR "nurse supervised triage" OR "standardized triage" OR "structured triage") AND ("road traffic injury" OR "traffic accident" OR "road accident" OR "trauma" OR "injury") AND ("low-income countr*" OR "middle-income countr*" OR "developing countr*" OR "resource-limited setting*" OR "LMIC")) | English language; Publication year 2010–2025 |
| **CINAHL (EBSCOhost)** | (MH "Triage" OR "nurse-led triage" OR "nursing triage" OR "standardized triage" OR "structured triage") AND (MH "Accidents, Traffic" OR "road traffic injury" OR "traffic accident" OR "trauma" OR "injury") AND (MH "Developing Countries" OR "low-income countr*" OR "middle-income countr*" OR "resource-limited setting*" OR "LMIC") | English; Human; Publication date 2010–2025 |
| **Embase (Ovid)** | ('nurse led triage'/exp OR 'nurse-led triage' OR 'nursing triage' OR 'standardized triage' OR 'structured triage') AND ('road traffic accident'/exp OR 'road traffic injury' OR 'traffic accident' OR 'trauma' OR 'injury') AND ('developing country'/exp OR 'low income country' OR 'middle income country' OR 'resource limited setting' OR 'LMIC') | English; Humans; Years 2010–2025 |
| **Web of Science** | TS=("nurse-led triage" OR "nursing triage" OR "nurse supervised triage" OR "standardized triage" OR "structured triage") AND TS=("road traffic injury" OR "traffic accident" OR "road accident" OR "trauma" OR "injury") AND TS=("low-income countr*" OR "middle-income countr*" OR "developing countr*" OR "resource-limited setting*" OR "LMIC") | English; Document type: Article; Timespan 2010–2025; Indexes: SCI-EXPANDED, SSCI, ESCI |

Note: Equivalent syntax was adapted for each database’s controlled vocabulary and field-search options. Truncation symbols (*) and proximity operators were applied as appropriate to broaden search coverage. Search results from each database were exported to EndNote X9, where duplicates were removed prior to screening. Manual backward and forward citation searches were conducted to ensure comprehensive retrieval. The number of records retrieved per database and search dates are reported in the PRISMA flow diagram.

**Supplementary Table 2. Summary of Quality Appraisal and Risk of Bias Across Included Studies**

| Study (Author, Year, Country) | Study Design | Appraisal Tool Used | Key Domains Assessed | Risk of Bias Rating | Overall Quality Judgment | Notes / Remarks |
| --- | --- | --- | --- | --- | --- | --- |
| Dalwai et al., 2017 – Afghanistan, Haiti & Sierra Leone26 | Multicountry retrospective validation | QUADAS-2 | Patient selection; index-test conduct; reference-standard validity; flow & timing | Low–to–unclear | High quality | Large multicountry SATS dataset (n = 5,813); minor concerns in blinding / follow-up completeness. |
| Dalwai et al., 2014 – Pakistan25 | Cross-sectional diagnostic validation | QUADAS-2 | Index-test reliability; reference-standard comparison; test applicability | Low | High quality | ICC = 0.77; sensitivity 70 %; specificity 97 %; blinded expert reference; trauma-dominant vignettes. |
| Lampi et al., 2018 – Kenya24 | Prospective descriptive observational | QUADAS-2 | Patient selection; index-test accuracy; reference-standard correlation | Low–to–unclear | Moderate quality | RETTS valid but reference standard (ISS) limited; no independent diagnostic gold standard. |
| Lowsby et al., 2017 – Sierra Leone29 | Service evaluation (implementation) | QUADAS-2 | Patient selection; index-test process; timing & flow | High | Low quality | Nurse-led SATS; high acuity recognition; concerns in flow/timing and comparator completeness affecting overall bias rating |
| Smith et al., 2022 – South Africa28 | Retrospective observational | QUADAS-2 | Index-test accuracy; internal validity; reporting bias | Low | High quality | Well-defined adult trauma dataset; trained nurse-triage officers; high inter-observer consistency. |
| Wangara et al., 2019 – Kenya17 | Cross-sectional observational | QUADAS-2 | Triage accuracy; under- / over-triage; outcome validity | Low | High quality | SATS implementation; sensitivity 92.2 %, under-triage 7.8 %; large LMIC tertiary ED dataset. |
| Harrison et al., 2012 – Malawi18 | Implementation project (pre–post) | ROBINS-I | Confounding; intervention classification; outcome measurement | Moderate–to–serious | Moderate quality | Adapted SATS; reliable but uncontrolled pre–post design; confounding possible. |
| Mathew et al., 2024 – India29 | Cross-sectional observational (prehospital) | JBI | Inclusion clarity; measurement validity; confounding control | Moderate | Acceptable quality | Prehospital RTA triage; consistent measurement but limited control for injury severity / delay. |

Note: SATS = South African Triage Scale; RETTS = Rapid Emergency Triage and Treatment System; ISS = Injury Severity Score; RTA = Road Traffic Accident; ICC = Intraclass Correlation Coefficient; LMIC = Low- and Middle-Income Country, QUADAS-2 = Quality Assessment of Diagnostic Accuracy Studies; ROBINS-I = Risk Of Bias In Non-randomized Studies of Interventions; JBI = Joanna Briggs Institute appraisal checklist, Risk-of-bias ratings were assigned according to each validated tool.
